# Supplementary material
Source: ML conference proceedings conference paper supplement (https://proceedings.neurips.cc/paper_files/paper/2015/hash/31b3b31a1c2f8a370206f111127c0dbd-Abstract.html)
Supplement: Supplementary file [file 31b3b31a1c2f8a370206f111127c0dbd-Supplemental.zip]

# Supplementary Notes for Halting in Random Walk Kernels

**Mahito Sugiyama**  
ISIR, Osaka University, Japan  
JST, PRESTO

mahito@ar.sanken.osaka-u.ac.jp

**Karsten M. Borgwardt**  
D-BSSE, ETH Zürich  
Basel, Switzerland

karsten.borgwardt@bsse.ethz.ch

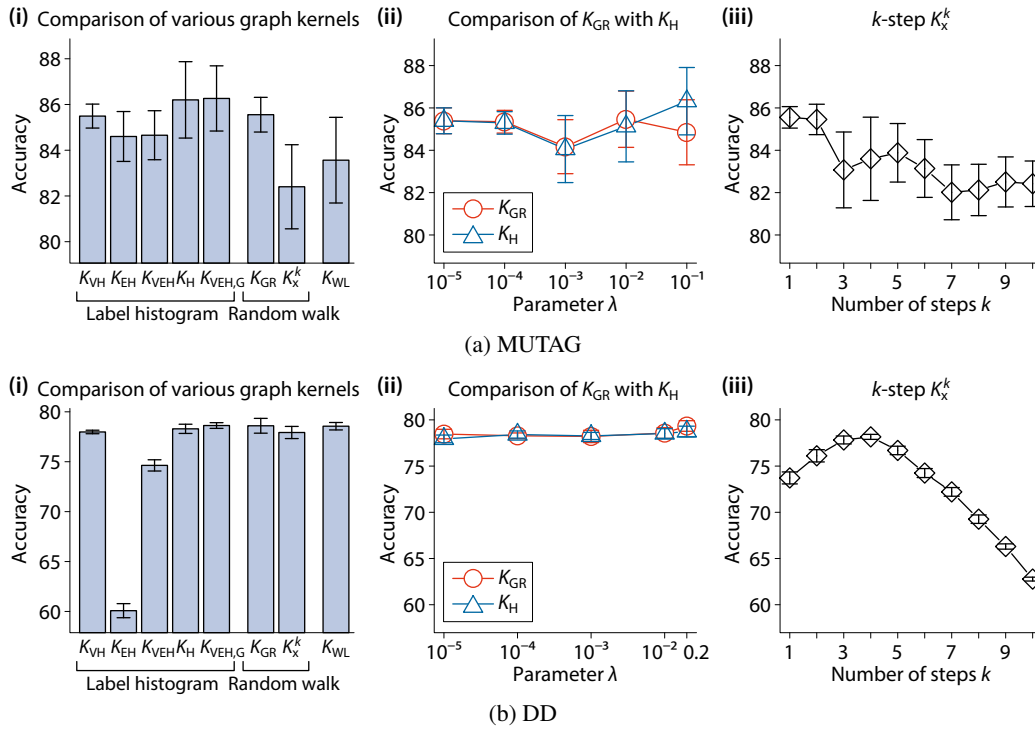

Figure S1: Accuracy results in real-world datasets (Means  $\pm$  SD).

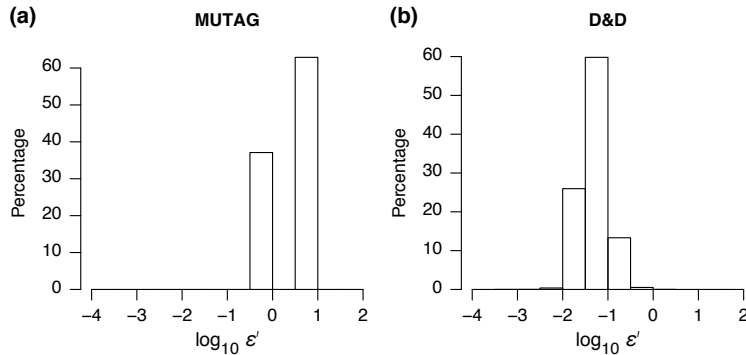

Figure S2: Distribution of  $\log_{10} \epsilon'$ , where  $\epsilon'$  is defined in Corollary 1, in real-world datasets.
